# Supplementary material for: The bacterial peptidoglycan-sensing molecule Pglyrp2 modulates brain development and behavior
Source: PubMed Central journal article supplement — Mol Psychiatry. 2016 Nov 15;22(2):257–66. doi: 10.1038/mp.2016.182 (PMC5285465; doi:10.1038/mp.2016.182), 2016-11-15
Supplement: mp2016182x8.pdf [file mp2016182x8.pdf]

**Supplementary Table 1. The nucleotide sequences of the PCR primers used to assay gene expression.**

| <b>Gene</b>          | <b>Primer</b> | <b>Sequence 5' to 3'</b>   | <b>Acc. No.</b> | <b>T (°C)</b> |
|----------------------|---------------|----------------------------|-----------------|---------------|
| <i>Pglyrp1</i>       | Forward       | tggtgttgctgtgctctc         | NM_009402.2     | 58            |
|                      | Reverse       | gatcaccacgtagcgaactg       |                 |               |
| <i>Pglyrp2</i>       | Forward       | ctgtgatactggagacaccttg     | NM_021319.5     | 58            |
|                      | Reverse       | tggctttgtcgtttgtaaag       |                 |               |
| <i>Pglyrp3</i>       | Forward       | ttcacttacctgcagagtaccac    | NM_207247.4     | 58            |
|                      | Reverse       | ttgcatcctggaacttgctcta     |                 |               |
| <i>Pglyrp4</i>       | Forward       | catttaccagtttccccaagt      | NM_207263.2     | 58            |
|                      | Reverse       | ttgagcagacaagtacctagga     |                 |               |
| <i>Nod1</i>          | Forward       | tcagtcttgcatcattcaatggcatc | NM_172729       | 58            |
|                      | Reverse       | tttggtcagccagattactgtca    |                 |               |
| <i>Nod2</i>          | Forward       | gaactctgcctagaggaaaacca    | NM_145857.2     | 58            |
|                      | Reverse       | gatgccattgttgacagtttca     |                 |               |
| <i>Tlr2</i>          | Forward       | ctcccacttcaggctctttg       | NM_011905.3     | 58            |
|                      | Reverse       | acccaaaacacttctctgctg      |                 |               |
| <i>PepT1/Slc15a1</i> | Forward       | ggctcgattctacacctacatc     | NM_053079.2     | 58            |
|                      | Reverse       | tgccctcacatattgtctgt       |                 |               |
| <i>c-Met</i>         | Forward       | caagggtaagagggcaagcta      | NM_008591.2     | 58            |
|                      | Reverse       | aacagccaagtcaacgattgg      |                 |               |
| <i>Bdnf</i>          | Forward       | gcgcccataagaagaagtaaa      | NM_001316310.   | 50            |
|                      | Reverse       | tcgtcagacctctcgaacct       |                 |               |
| <i>Synaptophysin</i> | Forward       | aagcaaccagcacctggcga       | NM_009305       | 58            |
|                      | Reverse       | tggctgcccgtaatcgggtt       |                 |               |
| <i>Hsp90ab1</i>      | Forward       | actcggcttcccgtcaagatgc     | NM_008302.3     | 58            |
|                      | Reverse       | tgatgaggacatgagctgggca     |                 |               |
| <i>Tbp</i>           | Forward       | ctcagttacaggtggcagca       | NM_013684.3     | 58            |
|                      | Reverse       | cagcacagagcaagcaactc       |                 |               |
