# Supplementary figures and images for: The bacterial peptidoglycan-sensing molecule Pglyrp2 modulates brain development and behavior
Source: PubMed Central journal article supplement — Mol Psychiatry. 2016 Nov 15;22(2):257–66. doi: 10.1038/mp.2016.182 (PMC5285465; doi:10.1038/mp.2016.182), 2016-11-15

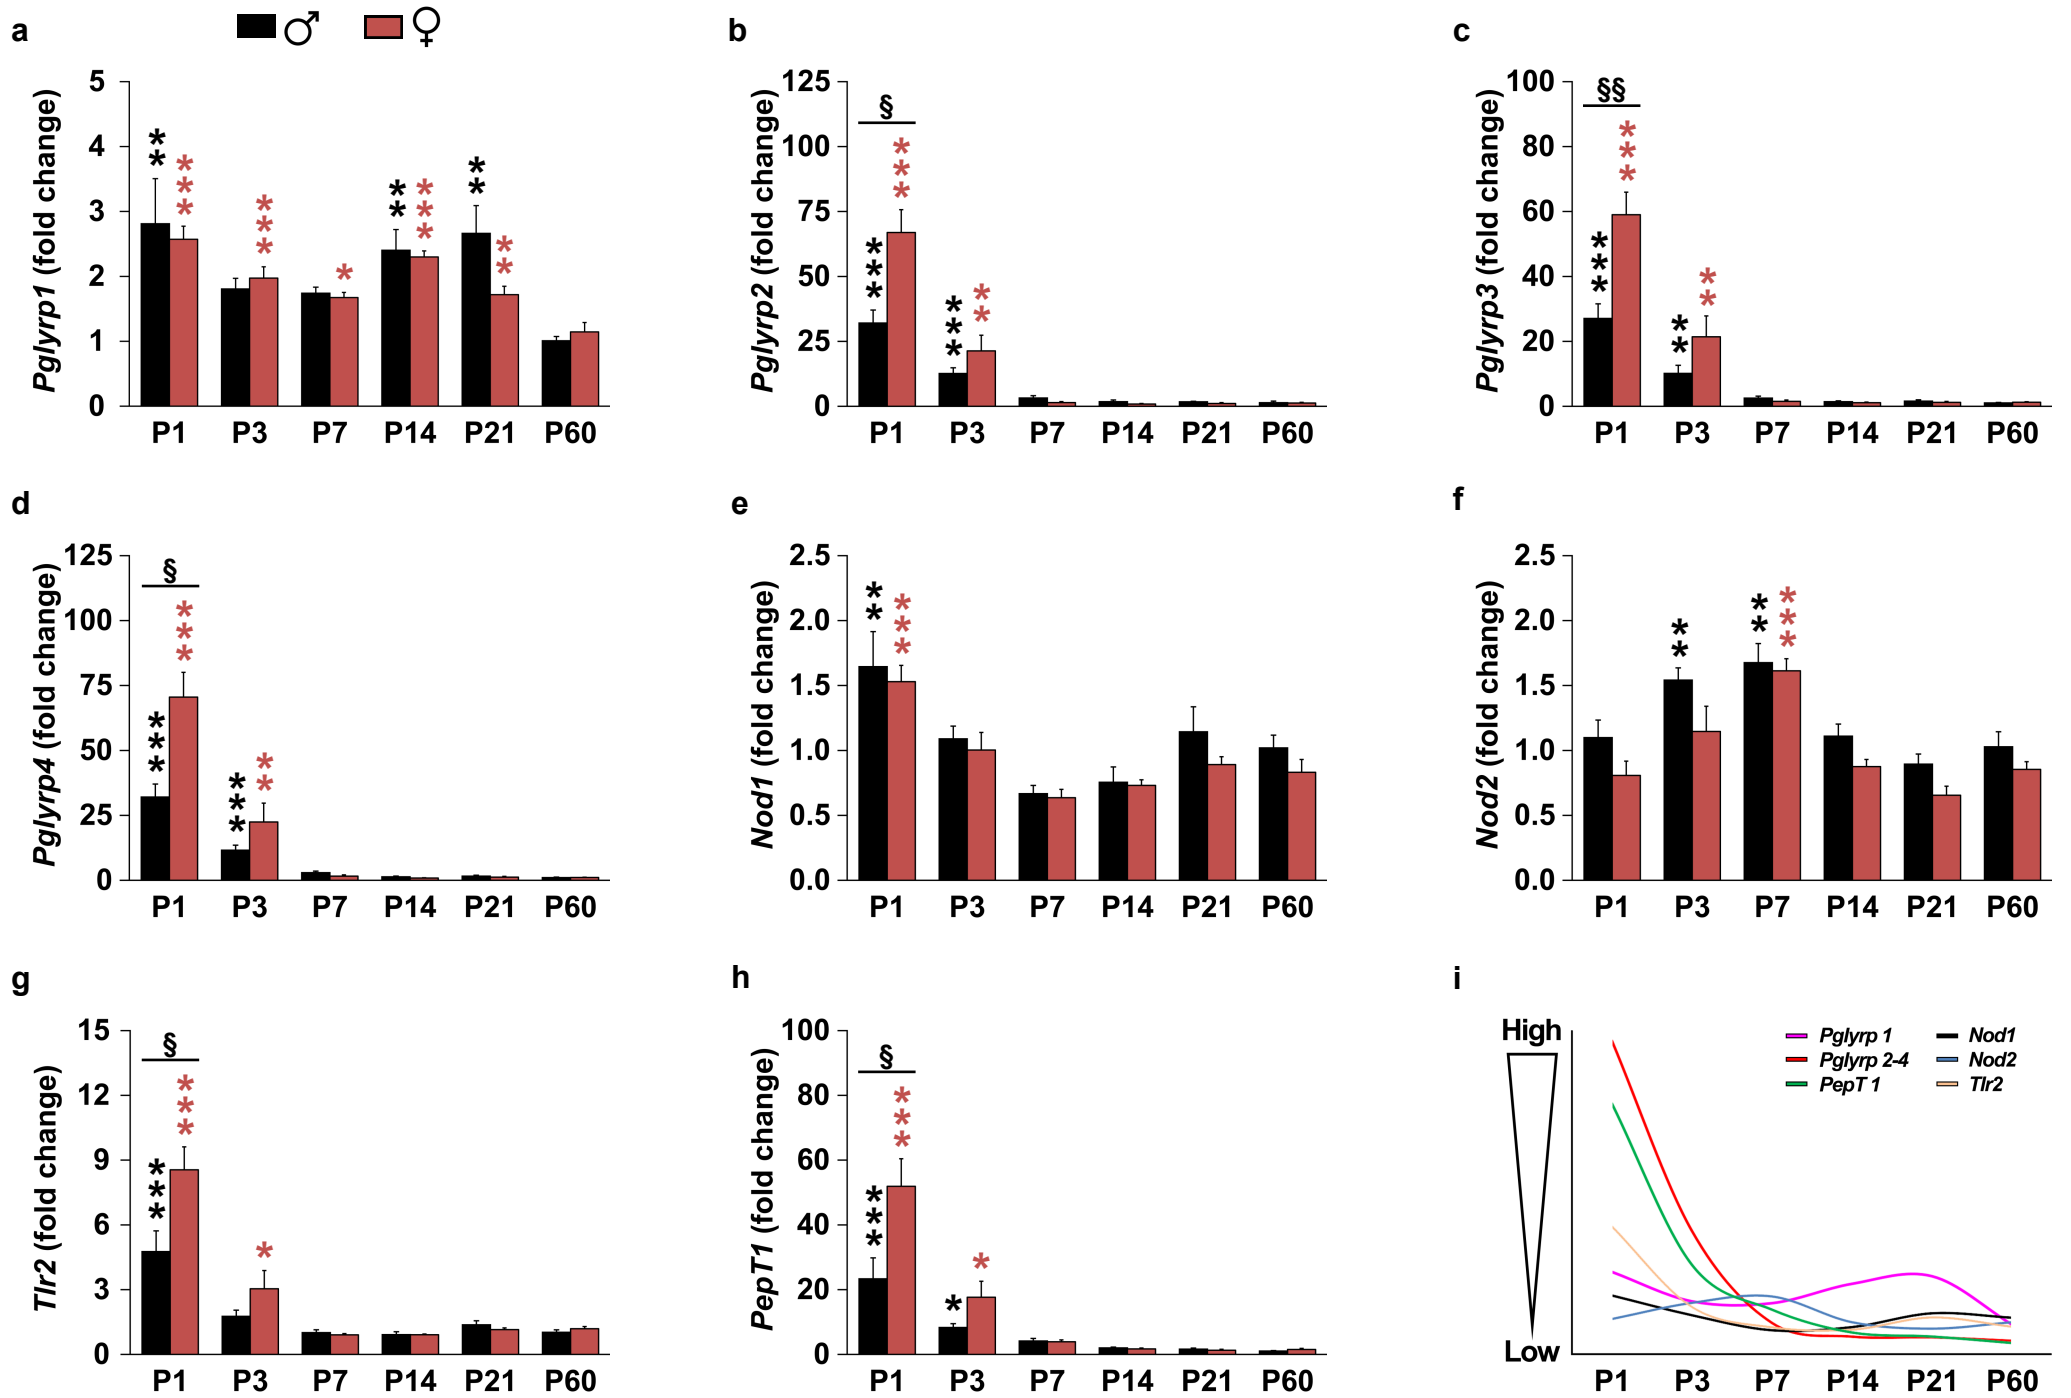

Supplementary Figure 1

Supplement: mp2016182x1.pdf [file mp2016182x1.pdf]

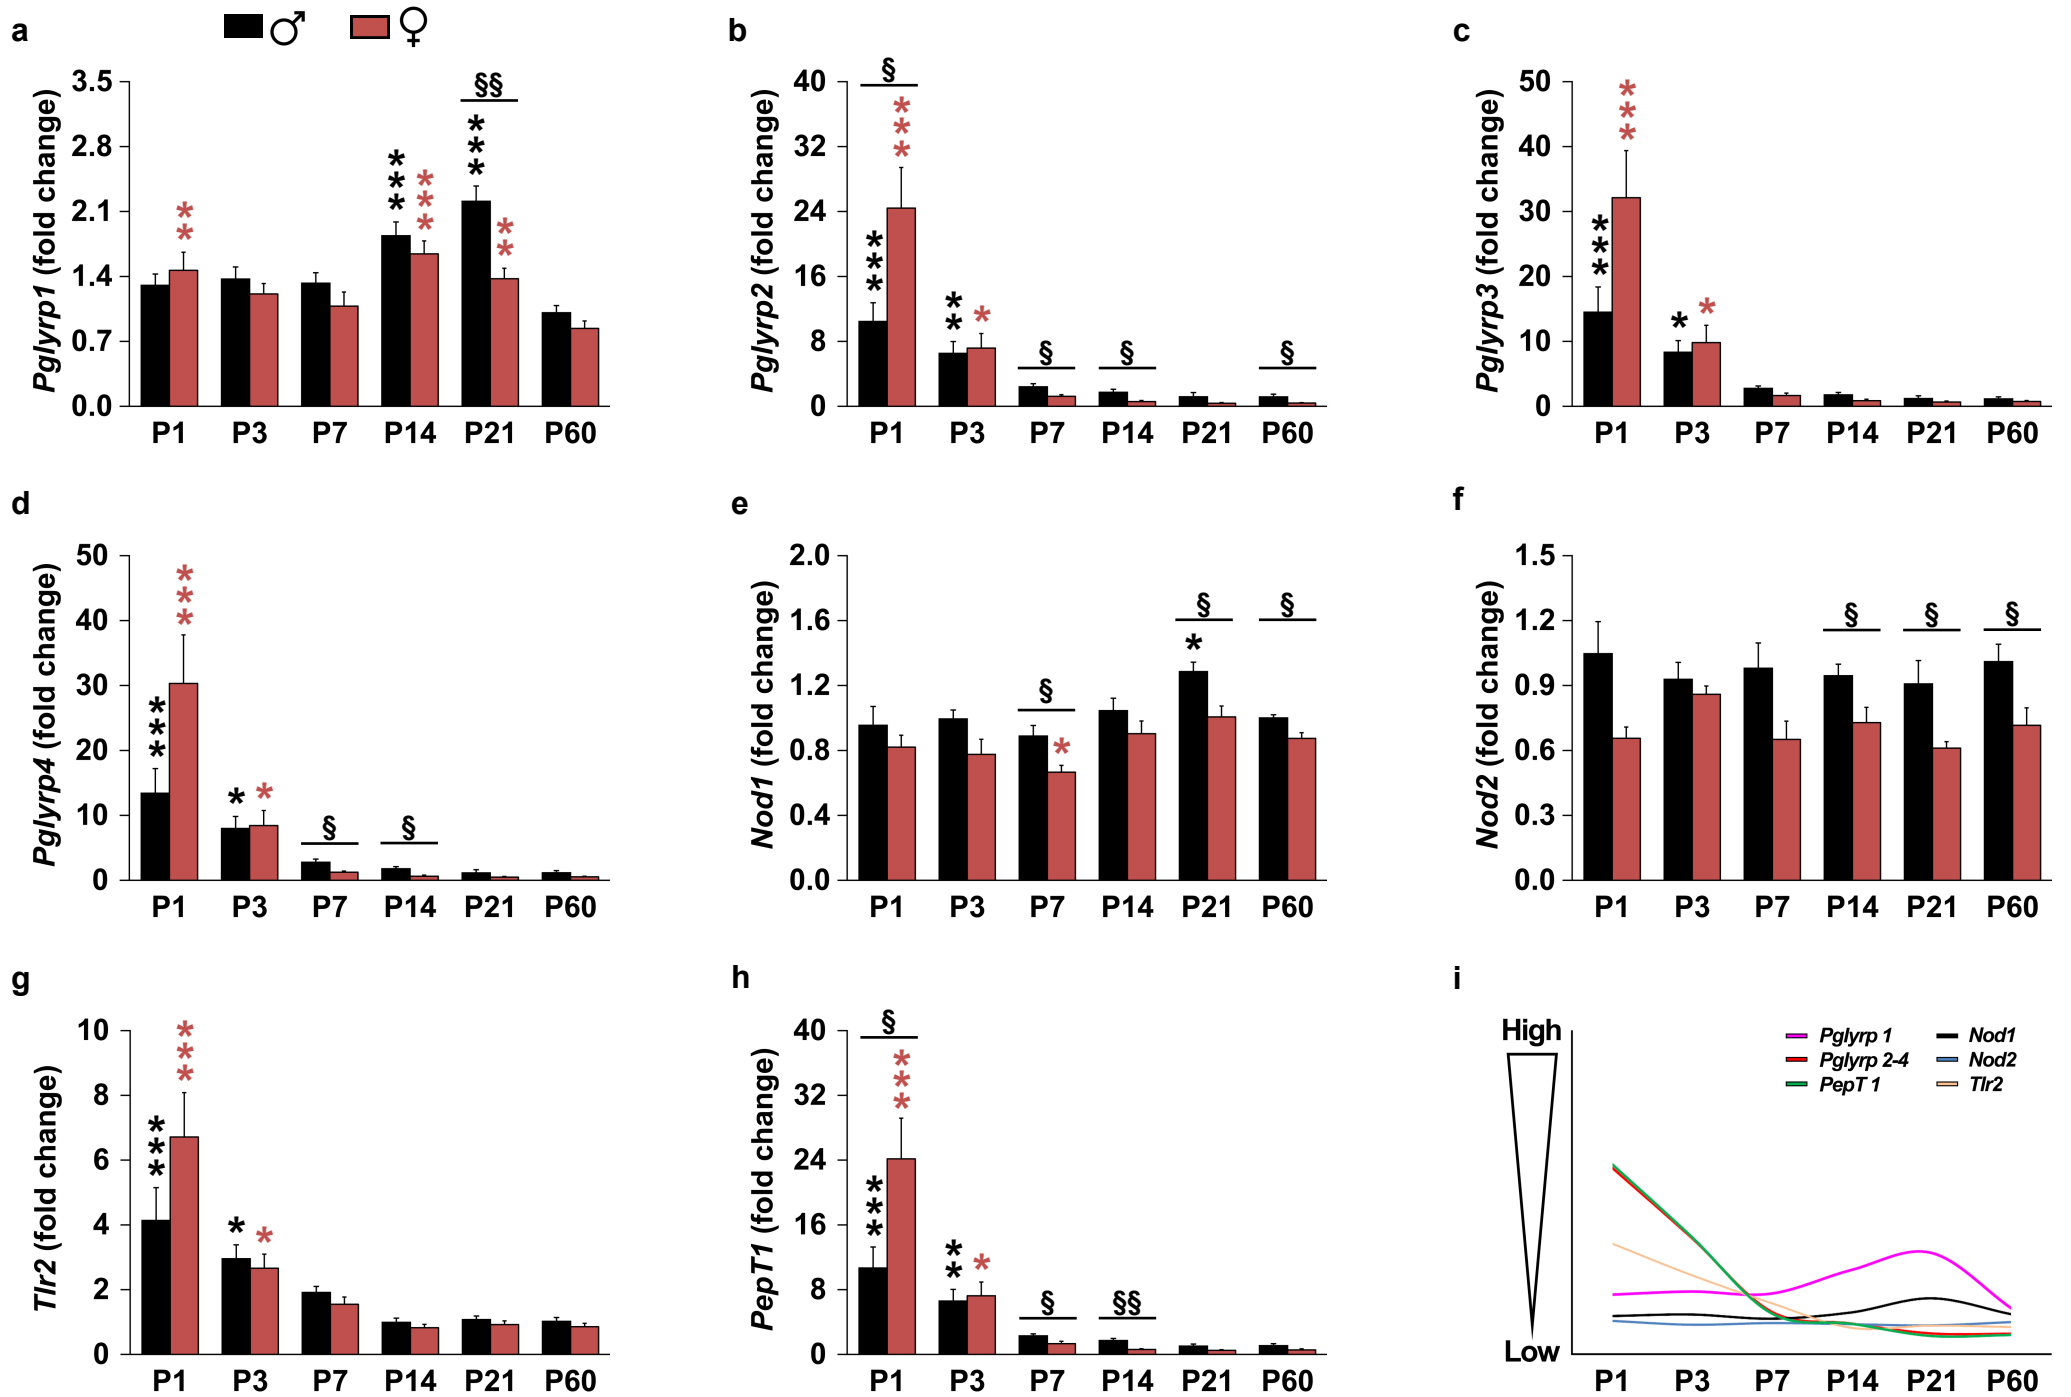

Supplementary Figure 2

Supplement: mp2016182x2.pdf [file mp2016182x2.pdf]

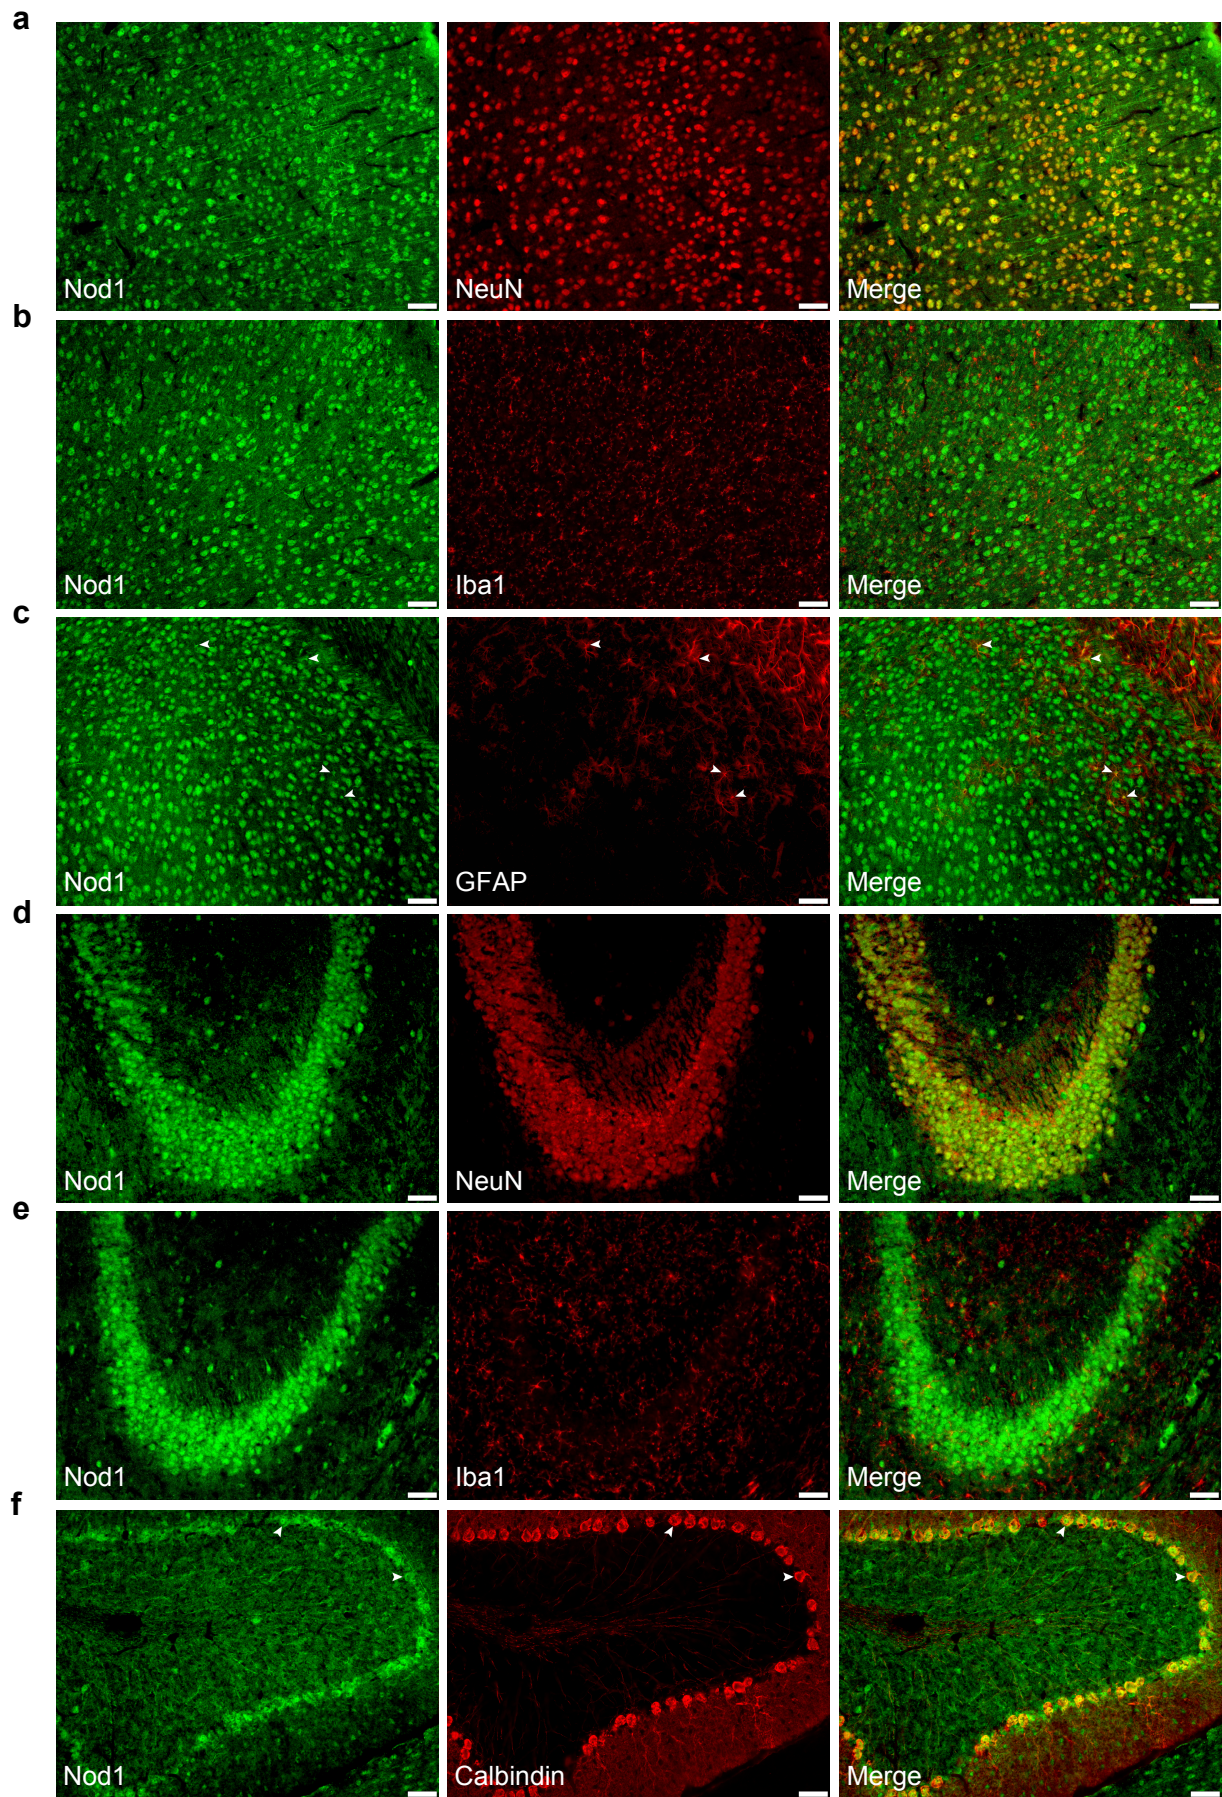

**Supplementary Figure 3**

Supplement: mp2016182x3.pdf [file mp2016182x3.pdf]

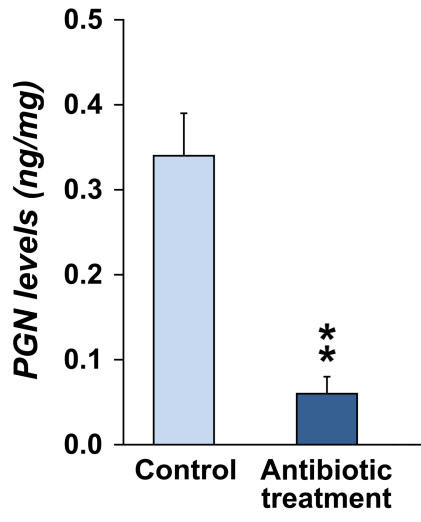

**Supplementary Figure 4**

Supplement: mp2016182x4.pdf [file mp2016182x4.pdf]

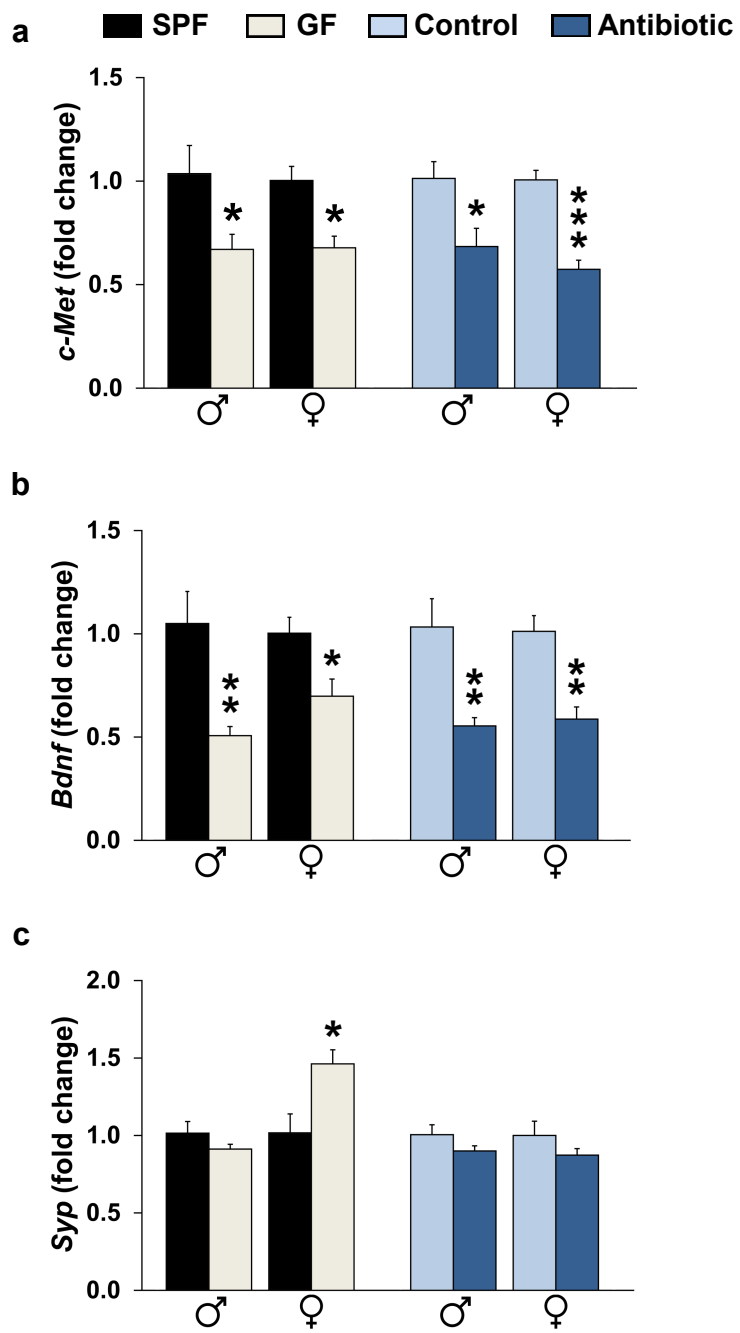

**Supplementary Figure 5**

Supplement: mp2016182x5.pdf [file mp2016182x5.pdf]

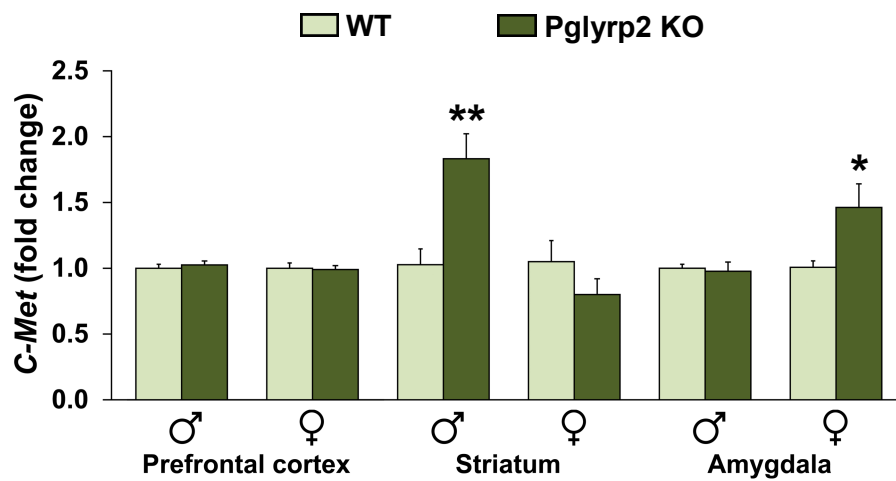

Supplementary Figure 6

Supplement: mp2016182x6.pdf [file mp2016182x6.pdf]

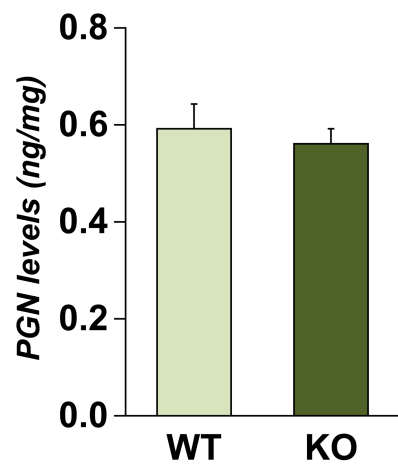

**Supplementary Figure 7**

Supplement: mp2016182x7.pdf [file mp2016182x7.pdf]
